1 **Machine learning based classification of cells into chronological**  
2 **stages using single-cell transcriptomics**

3

4 **Authors**

5 Sumeet Pal Singh<sup>1\*</sup>, Sharan Janjuha<sup>1,2</sup>, Samata Chaudhuri<sup>3,4</sup>, Susanne  
6 Reinhardt<sup>1</sup>, Sevina Dietz<sup>1</sup>, Anne Eugster<sup>1</sup>, Halil Bilgin<sup>5</sup>, Selçuk Korkmaz<sup>6</sup>, John  
7 E. Reid<sup>7</sup>, Gökmen Zararsız<sup>8</sup>, Nikolay Ninov<sup>1,2\*</sup>

8 **Affiliations**

9 <sup>1</sup>Center for Molecular and Cellular Bioengineering, TU Dresden, Dresden 01307, Germany

10 <sup>2</sup>Paul Langerhans Institute Dresden of the Helmholtz Center Munich at the University

11 Hospital Carl Gustav Carus of TU Dresden, Dresden 01307, Germany

12 <sup>3</sup>Max Planck Institute of Molecular Cell Biology and Genetics, Dresden 01307, Germany

13 <sup>4</sup>B CUBE- Center for Molecular Bioengineering, TU Dresden 01307, Germany

14 <sup>5</sup>Department of Computer Engineering, Abdullah Gül University, Kayseri 38030, Turkey

15 <sup>6</sup>Department of Biostatistics, Trakya University, Edirne 22030, Turkey

16 <sup>7</sup>MRC Biostatistics Unit, University of Cambridge, CB2 0SR, UK

17 <sup>8</sup>Department of Biostatistics, Erciyes University, Kayseri 38030, Turkey

18 **\*Correspondence to:** [sumeet\\_pal.singh@tu-dresden.de](mailto:sumeet_pal.singh@tu-dresden.de) and [nikolay.ninov@tu-dresden.de](mailto:nikolay.ninov@tu-dresden.de)

19 **ABSTRACT**

20 Age-associated deterioration of cellular physiology leads to pathological conditions. The  
21 ability to detect premature aging could provide a window for preventive therapies against age-  
22 related diseases. However, the techniques for determining cellular age are limited, as they rely  
23 on a limited set of histological markers and lack predictive power. Here, we implement  
24 GERAS (Genetic Reference for Age of Single-cell), a machine learning based framework  
25 capable of assigning individual cells to chronological stages based on their transcriptomes.  
26 GERAS displays greater than 90% accuracy in classifying the chronological stage of  
27 zebrafish and human pancreatic cells. The framework demonstrates robustness against  
28 biological and technical noise, as evaluated by its performance on independent samplings of  
29 single-cells. Additionally, GERAS determines the impact of differences in calorie intake and  
30 BMI on the aging of zebrafish and human pancreatic cells, respectively. We further harness  
31 the predictive power of GERAS to identify genome-wide molecular factors that correlate with  
32 aging. We show that one of these factors, *jumb*, is necessary to maintain the proliferative state  
33 of juvenile beta-cells. Our results showcase the applicability of a machine learning framework  
34 to classify the chronological stage of heterogeneous cell populations, while enabling to detect  
35 pro-aging factors and candidate genes associated with aging.

36

37

38

## 39 BACKGROUND

40 Aging is a universal phenomenon, during which cells undergo progressive  
41 transcriptional<sup>1,2</sup>, genomic<sup>3,4</sup>, epigenetic<sup>5</sup>, and metabolic<sup>6</sup> changes. The age-related  
42 modifications can deteriorate the functional properties of cells. The accumulation of cellular  
43 defects can lead to a decline in organismal health and to the onset of age-related diseases. A  
44 major focus of the biology of aging is to identify factors that accelerate or slow-down,  
45 preferably even reverse, the cellular aging process. Biological studies have identified  
46 multiple modifiers of the aging process, including genetic and environmental factors<sup>7,8</sup>. For  
47 instance, caloric restriction has been demonstrated to increase lifespan in multiple species<sup>9</sup>,  
48 including humans<sup>10</sup>. However, the discovery of factors that influence aging relies on  
49 retrospective measures, after the impact of age has already manifested itself, and depends on a  
50 restricted set of indicators based on histological analysis<sup>11</sup>. It is therefore imperative to  
51 develop reliable indicators of cellular age that forgo the need for detrimental phenotypes.  
52 Predicting cellular aging before the defects manifest themselves would provide a window for  
53 therapeutic interventions. Preventive therapies during this window would bypass additional  
54 complications arising after the onset of the pathology.

55 The development of a reliable cellular age predictor requires two principal  
56 components. Firstly, it entails a reliable assessment of the transitions cells undergo with age.  
57 Secondly, the predictor should be capable of placing cells of unknown age along this  
58 transition path in order to estimate their age. The first objective, assessment of cellular  
59 transitions, has been enabled by recent advances in single-cell mRNA expression profiling<sup>12</sup>.  
60 Cellular progression through the transitions is increasingly being described by both heuristic  
61 methods and probabilistic models. These methods are categorized as pseudotemporal  
62 estimation algorithms and use techniques such as dimensionality reduction, graph theory,  
63 bifurcation analysis and optimal-transport analysis to place cells along a transition trajectory  
64<sup>13-18</sup>. All the methods make explicit or implicit assumptions about the smoothness of mRNA

65 expression profiles along the trajectories and seek to explain part of the variation across the  
66 cells by location along the trajectory. Unwanted variation that cannot be explained by  
67 trajectory location can confound the analysis. Some methods protect against confounding  
68 effects by using a prior over pseudotime that leverages information about the time cells were  
69 assayed<sup>18</sup> whilst others do not. Although current methods can reveal cellular transitions  
70 during a differentiation process<sup>19–22</sup>, they have only been shown to work retrospectively, that  
71 is they have no predictive ability to insert *de-novo* samples into the trajectories. Thus, their  
72 predictive utility on unseen cells, the second objective, remains unresolved.

73 Prediction of the position of *de-novo* samples in a cellular transition trajectory requires  
74 discrimination of the transcriptional features of importance from the confounding factors that  
75 accompany single-cell measurements. The three main confounding factors are: 1) biological  
76 noise due to fluctuations in mRNA expression levels, 2) technical noise inherent in single-cell  
77 mRNA sequencing, and 3) cell-type diversity within an organ. Biological noise can arise due  
78 to the stochasticity in biochemical processes involved in mRNA production and degradation  
79<sup>23,24</sup>, heterogeneity in the cellular microenvironment<sup>25</sup>, and many more unknown factors.  
80 Although mechanisms such as the passive transport of newly transcribed mRNA from the  
81 nucleus to the cytoplasm exist to reduce the level of biological noise<sup>26</sup>, it can never be  
82 eliminated completely<sup>23</sup>. In fact, aging might enhance fluctuations in mRNA expression  
83 levels<sup>27,28</sup>. Nevertheless, in certain contexts, fluctuations in expression levels are beneficial  
84 to the organism<sup>29,30</sup>. Technical noise, on the other hand, arises due to the sensitivity and  
85 depth of single-cell sequencing technology<sup>31</sup>. Sequencing involves conversion of mRNA into  
86 cDNA and amplification of the minute amounts of cDNA. These steps could omit certain  
87 mRNA molecules, muting their detection. Moreover, amplified cDNA molecules might  
88 escape sequencing due to the limits on the comprehensiveness of the technology. In effect,  
89 expression noise is inherent to single-cell measurements.

90           The diversity in cell types within an organ adds a second layer of complexity to the  
91 inherent noise in mRNA expression. Diverse types of cells express unique sets of genes and  
92 regulatory networks. Moreover, numerous studies have demonstrated the presence of cellular  
93 sub-populations within nominally homogenous cells<sup>32,33</sup>. For example, pancreatic beta-cells  
94 have been shown to consist of dynamic sub-populations with different proliferative and  
95 functional properties<sup>34-36</sup>, and liver cells were demonstrated to display variability in gene  
96 expression depending on their location within the organ<sup>37</sup>. Thus, the inherent cell-to-cell  
97 heterogeneity adds to the challenge of extracting age-specific transitions from mRNA  
98 expression profiles. Furthermore, cellular heterogeneity makes it difficult to extrapolate the  
99 results from studies at the tissue-scale to the aging of individual cells and to identify common  
100 molecular signatures of aging<sup>38,39</sup>.

101           In this study, we provide a framework that efficiently ‘learns’ the cellular transitions  
102 of aging from single-cell gene expression data in the presence of expression noise and cellular  
103 heterogeneity. First, the age predictor is trained to recognize the age of individual cells based  
104 on their chronological stage. Chronological stage is an easily measurable fact, and hence  
105 provides a ground truth for the training. Second, we show that the trained predictor can place  
106 robustly cells of unknown ages along the aging path. To show the utility of the age predictor,  
107 we apply it to the pancreatic beta-cells, which represent an excellent system for studying  
108 aging. In mammals, the beta-cell mass is established during infancy and serves the individual  
109 throughout life<sup>40</sup>. The long-lived beta-cells support blood glucose regulation, with their  
110 dysfunction implicated in the development of Type 2 diabetes. Older beta-cells display  
111 hallmarks of aging, such as a reduced proliferative capacity and impaired function<sup>41</sup>. We first  
112 focus on the zebrafish beta-cells due to the potential for visualization and genetic  
113 manipulation of beta-cells at single-cell resolution<sup>36</sup>, and extend our framework to human  
114 pancreatic cells using publicly available published datasets. Finally, we demonstrate the  
115 predictor’s utility in identifying age-modifying genetic and environmental factors.

## 116 **RESULTS**

### 117 **Machine learning based framework accurately and robustly predicts chronological stage**

118 To capture the transcriptional dynamics of beta-cells with age, we performed single-  
119 cell mRNA sequencing of beta-cells in primary islets dissected from animals belonging to  
120 three chronological stages: Juvenile (1 month post-fertilization (mpf)), Adolescent (3, 4 and 6  
121 mpf) and Adult (10, 12 and 14 mpf). Using *Tg(ins:Betabow)*<sup>36</sup>, a transgenic line that  
122 specifically marks zebrafish beta-cells with red fluorescence (Supplementary Fig. S1), we  
123 isolated and sequenced 827 beta-cells in multiple batches. Sequencing was performed using  
124 the Smart-Seq2 protocol, which has been demonstrated to provide higher transcriptional  
125 coverage than other methods<sup>42</sup>. The sequenced cells were quality-controlled to yield a total  
126 of 645 beta-cells (Supplementary Fig. S2). To identify age-specific transitions, we first  
127 attempted to order the cells using an unsupervised pseudotemporal analysis (Supplementary  
128 Fig. S3). However, the beta-cells from the three chronological stages were broadly spread  
129 along the predicted temporal trajectory. The shortfall of unsupervised pseudotemporal  
130 ordering prompted us to consider an alternative approach in which we modeled the data using  
131 the ground truth provided by the chronological stage. For this, we developed a supervised  
132 deep learning framework to predict the stage of the cellular origin: Juvenile, Adolescent or  
133 Adult (Fig. 1a). As input to the classifier, genes detected in all the cells were ranked in  
134 descending order of their variability and the top 1000 genes were selected for training  
135 (Supplementary Table S1). Since neural networks are prone to overfitting, two normalizing  
136 hyperparameters were added: L2 regularization (which penalizes a strong focus on few  
137 inputs) and dropout regularization (which helps ‘averaging’ across connections). This  
138 framework was named GERAS (GENetic Reference for Age of Single-cell) in reference to the  
139 Greek God of old age.

140 For training GERAS, 80% of the beta-cells were randomly chosen. Optimal  
141 normalizing hyperparameters determined by cross-validation were used for training the final

142 predictor. Following development, we estimated the contribution of the 1000 input genes  
143 towards accurate predictions (Supplementary Fig. S4, Supplementary Table S1). The  
144 estimation showed that the input genes displayed a wide distribution of importance towards  
145 the accuracy of prediction. Notably, some of these genes were previously implicated in  
146 diabetes (Supplementary Fig. S4b). Using the trained GERAS, internal validation was carried  
147 out with a test set comprising the remaining 20% of the cells from each chronological stage.  
148 The cells of the test set had never been shown to GERAS. Internal validation achieved an  
149 overall accuracy (proportion of cells for which the predicted stage matched the real stage) of  
150 91% (Fig. 1b). This demonstrates the success of GERAS in classifying individual cells into  
151 chronological stages based solely on their mRNA expression profile.

152       Next, we wanted to understand the robustness of GERAS under biological and  
153 technical noise, typically encountered in batch measurements of single-cells. To this end, we  
154 performed external validation using independently sequenced beta-cells. We sequenced a  
155 new batch of beta-cells from adolescent animals (4 mpf) and used GERAS to predict their  
156 chronological age. All cells from this independent cohort were classified as ‘Adolescent’  
157 (100% accuracy), the ground truth for the stage of the cells (Fig. 1c). Additionally, we tested  
158 the performance of GERAS with beta-cells sequenced using alternative pipelines.  
159 Specifically, we utilized the C1-Chip platform from Fluidigm to sequence a new batch of  
160 beta-cells from adolescent animals (3 mpf). GERAS achieved 92.3% success in correctly  
161 classifying the cells from the new batch as ‘Adolescent’ (Fig. 1c). These data underscore the  
162 potential of GERAS in effectively handling batch effects.

163       To test the performance of GERAS on a regression task, we evaluated the model’s  
164 ability to classify cells obtained from time-points in-between the discrete chronological stages  
165 we used for training. For interpolation, we collected beta-cells from animals aged 1.5 mpf  
166 (juvenile) or 9 mpf (adult) since these ages were not part of the model’s constituent stages.  
167 GERAS classified 50% of the beta-cells from 1.5 mpf animals as ‘Juvenile’, and 47.3% as

168 ‘Adolescent’ (Fig. 1d). Thus, GERAS classified 97.3% of beta-cells in time-periods  
169 neighboring the actual age of the sample. Similarly, 31% of the beta-cells from 9 mpf  
170 animals were classified as ‘Adolescent’, and 69% as ‘Adult’ (Fig. 1d). None (0%) of the cells  
171 were attributed to the ‘Juvenile’ stage, further strengthening the interpolation capacity of  
172 GERAS. Taken together, these results demonstrate that our model divides the continuous  
173 time variable into discrete but linearly-ordered stages, thereby allowing regression analysis of  
174 the data.

### 175 **GERAS evaluates the impact of an environmental factor on cellular age**

176 The rate of aging is susceptible to modifications<sup>8</sup> and nutritional cues have been noted  
177 to alter aging in many organisms<sup>9,10</sup>. To investigate the effect of altering nutritional cues on  
178 cellular age, we employed the ability of GERAS to handle batch effects and interpolation.  
179 Specifically, we focused on studying the impact of calorie intake on beta-cell aging. We  
180 separated 3 mpf adolescent zebrafish siblings into two groups. One group was fed three times  
181 a day with *Artemia*, a typical fish diet consisting of living prey with a relatively high amount  
182 of fat and carbohydrates<sup>43</sup>. The other group was placed on intermittent feeding with normal  
183 feeding performed on alternate days (Fig. 2a). After one month, the beta-cells were isolated  
184 and the age of individual beta-cells was evaluated using GERAS for each group. The analysis  
185 showed a striking difference in age between the two sets of beta-cells obtained from coeval  
186 adolescent zebrafish (Fig. 2a). While 65% of the beta-cells from zebrafish on intermittent  
187 feeding were classified as ‘Adolescent’, only 23% of the beta-cells from three-times-a-day-  
188 fed animals were similarly classified; the rest 77% were categorized as ‘Adult’. This  
189 difference in classification of the beta-cells isolated from animals of the same age suggests  
190 that higher-caloric intake expedites the aging of young beta-cells. Moreover, it shows the  
191 utility of GERAS in evaluating a pro-aging factor.

### 192 **GERAS-based predictions lead to discovery of a molecular factor involved in aging**



193 To identify molecular players underlying the accelerated aging of beta-cells with  
194 higher-calorie intake, we harnessed the heterogeneity in the chronological stage predictions  
195 along with the inherent heterogeneity in gene expression within single cells. In our  
196 framework, chronological stage predictions can be easily converted to classification  
197 probability by using the output of ‘softmax’ layer (Fig. 1a and Methods). This transforms  
198 discrete classifications into a continuous probability distribution (Supplementary Fig. S5).  
199 Taking advantage of this approach, we calculated the correlation between the probabilities of  
200 the beta-cells to be classified in the younger (‘Adolescent’) stage with the mRNA expression  
201 levels of all 11,570 genes expressed in the beta-cells (Supplementary Fig. S5). For correlation  
202 analysis, genes with positive correlation increase the chance of the cell being classified in the  
203 younger stage, while a negative correlation enhances the chance of classification in the older  
204 stage. The correlation analysis for beta-cells from three-times-a-day fed animals revealed  
205 1158 genes exhibiting high (positive or negative) correlation with predictive probability (Fig.  
206 2b, Supplementary Table S2 and S3). Unbiased gene ontology analysis using DAVID<sup>44</sup>  
207 revealed involvement of the highly correlated genes in aging-related pathways, including  
208 cellular differentiation, protein transport<sup>45,46</sup>, amino acid biosynthesis<sup>47,48</sup>, NAD+ ADP-  
209 ribosyltransferase activity<sup>49</sup> and basic-leucine zipper domain containing transcription factors  
210<sup>50</sup> (Fig. 2c). In particular, there was a positive correlation with the transcription factors *junba*  
211 and *fosab*, suggesting a role for these genes in the classification of the beta-cells to the  
212 younger, ‘Adolescent’, stage (Fig. 2b). Additionally, in our primary mRNA expression data  
213 of beta-cells from three chronological stages, *junba* and *fosab* displayed significant down-  
214 regulation with age (Supplementary Fig. S6). Notably, *junba*, was not one of the 1000-input  
215 genes utilized by GERAS for generating predictions, demonstrating the capacity of  
216 correlation analysis to identify genome-wide candidate genes.

217 Based on the observation that *junba* expression in beta-cells declines with age, and its  
218 positive correlation with the classification of beta-cells from animals on a higher-calorie diet

219 to the younger stage, we decided to investigate the biological impact of reducing *junba*  
220 function. For this, we overexpressed a dominant negative version of *junba* specifically in  
221 beta-cells (using an *ins:nls-BFP-2A-DN-junba* construct) (Supplementary Fig. S7a). The  
222 expression of *nls-BFP-2A-DN-junba* was induced in the background of the beta-cell specific  
223 fluorescence ubiquitination cell cycle indicator (FUCCI)-reporters<sup>51,52</sup>, allowing  
224 identification of beta-cell's cell-cycle stage (Supplementary Fig. S7b, c). Comparison  
225 between the juxtaposed *DN-junba*-expressing and control cells within islets from juveniles (1  
226 mpf), a stage associated with high rates of beta-cell proliferation<sup>51</sup>, showed a 50% decline in  
227 proliferation upon *DN-junba* expression (Fig. 3a, b). Thus, blocking *junba* function can  
228 reduce the proliferation of juvenile beta-cells. Since the reduction in proliferation of beta-  
229 cells is a hallmark of aging<sup>41</sup>, our results suggest that declining *junba* expression might  
230 underlie this reduction.

### 231 **A single model for chronological stage classification of the entire human pancreatic cells**

232 Next, to test the applicability of our framework beyond the scope of zebrafish beta-  
233 cells, we developed a classifier for human cells using the entire ensemble of pancreatic cells.  
234 The pancreas, a gland located in the abdomen, is involved in metabolic regulation and food  
235 digestion. Metabolic regulation is accomplished by the endocrine part of the pancreas, which  
236 chiefly consists of beta-, alpha-, and delta-cells. Food digestion, on the other hand, is  
237 contributed by the exocrine part of the pancreas, composed of ductal and acinar cells. An  
238 important characteristic of pancreatic cells is the presence of cell-specific marker genes,  
239 allowing computational segregation of the various cell-types based on mRNA expression  
240 levels (Methods). To develop the classifier for human pancreatic cells, we obtained single-  
241 cell mRNA expression profiles from Enge et al. Their study generated single-cell  
242 transcriptomes from pancreatic cells of eight healthy individuals belonging to three discrete  
243 stages<sup>27</sup>: Juvenile (1 month, 5 and 6 years), Young (21 and 22 years), and Middle (38, 44 and  
244 54 years) (Fig. 4a). Without segregating the data by cell-type, we trained GERAS to predict

245 the chronological stage for the entire ensemble of pancreatic cells. The trained GERAS,  
246 utilizing inputs from multiple genes (Supplementary Fig. S8, Supplementary Table S4),  
247 achieved an overall accuracy of 95% on the test set (Fig. 4b). Upon segregating the results by  
248 cell type, based on the expression of their respective markers, we found that GERAS  
249 displayed >90% accuracy for each major cell-type of the pancreas (Fig. 4b'), demonstrating  
250 the feasibility of developing a single age classifier for the multiple cell types of the pancreas.

251 As an additional validation, a second assessment with human cells was undertaken by  
252 utilizing the single-cell mRNA expression profiles of human pancreatic cells from a  
253 publication by Segerstolpe et al.<sup>53</sup>. This independent cohort contains single-cell  
254 transcriptomes from pancreata of six healthy individuals ranging from 22 – 48 year of age.  
255 Additionally, the body mass index (BMI) for each individual was reported, allowing  
256 comparisons between individuals with similar chronological age but different body weight.  
257 Using GERAS trained with the human data from Enge et al., we predicted the chronological  
258 stage of the cells from two individuals (aged 43 and 48 years) belonging to the 'Middle' age  
259 group (38 – 54 years). The predictions displayed >93% classification accuracy (Fig. 4c).  
260 This high accuracy of prediction on data from a second independent source further  
261 strengthens the external validation of our model. Next, we utilized the data from two  
262 individuals, aged 23 and 22 years. Despite the proximity in their chronological age, these two  
263 individuals differed in their BMI values (21.5 – normal and 32.9 – obese, respectively).  
264 Strikingly, our analysis revealed different classification pattern for data from each of these  
265 individuals: while 32% of the cells from the 23 year old with normal BMI were classified in  
266 the younger stages, none of the cells from the 22 year old with obese BMI fell in similar  
267 stages (Fig. 4d). Following this observation, we calculated the classification probability of  
268 the all six individuals in relation to their BMI. The probability results from our analysis  
269 suggest that an obese BMI correlates with an increased probability for the cells to be  
270 classified in an older stage (Supplementary Fig. S9). We recommend exercising caution

271 while interpreting this result due to the multiple confounding factors associated with human  
272 samples that we could not control for. A GERAS developed with cells from individuals  
273 encompassing a wider distribution of age and BMI range would be desired for stronger  
274 conclusions. Nevertheless, the successful age classification of an entire human organ and its  
275 external validation, demonstrate the adaptability of our framework to diverse cell-types,  
276 thereby establishing the universality of the approach.

## 277 **DISCUSSION**

278 In this study, we have presented a method that provides the blueprint for developing  
279 predictive classifier for cellular aging. Our chronological stage predictor efficiently handles  
280 biological and technical noise, and functions robustly on a diverse cell population. The  
281 temporal classifier was developed in an unbiased, data-driven manner. Genes for building the  
282 predictor were not selected based on their differential expression with time. The classifier  
283 predicted the chronological age solely from the expression profile of the top 1000 most  
284 variable genes. The algorithm, however, did not use all genes uniformly. Instead, varying  
285 levels of importance were attributed to the input genes (Supplementary Fig. S4, S8). Multiple  
286 genes exhibiting high importance for successful classification show an existing association  
287 with metabolic and age-related degenerative disorders. For instance, the human pancreatic  
288 GERAS ascribes high importance to Amyloid precursor protein (APP), which is associated  
289 with Alzheimer's disease, and also recently implicated in pancreatic biology<sup>54</sup>. In the future,  
290 it would be worthwhile to test the biological functions for the genes selected by the classifier,  
291 and to follow-up on them as potential biomarkers of the aging process.

292 The predictive power of the framework is not restricted to classification tasks. The  
293 discrete classifications can be readily converted to a continuous probability distribution  
294 (Supplementary Fig. S5). This characteristic can be exploited to shed light on the molecular  
295 factors controlling the rate of aging. We used this feature on beta-cells displaying accelerated  
296 aging in response to a higher calorie diet (Fig. 2a). Correlating the probability distribution

297 with gene expression enabled identification of candidate genes involved in the aging process  
298 (Fig. 2b, c). Such analysis was possible due to the single-cell-centric nature of our approach,  
299 and would be missed out with bulk sequencing in which the cellular variability is averaged  
300 out. Follow-up analysis using a genetic technique (Supplementary Fig. S7) verified the role  
301 of one candidate gene, *junba*, in regulating the proliferation of beta-cells (Fig. 3). It is  
302 important to note that the mosaic analysis was performed in whole islets without any tissue  
303 dissociation, thus avoiding any dissociation-specific modification in cell physiology<sup>55</sup>.  
304 However, a reduction in proliferation represents one aspect of the aging process, and  
305 additional roles for *junba* activity during the aging process still need verification.  
306 Nonetheless, the age-dependent reduction of *Junb*, the mammalian homologue of *junba*, has  
307 been implicated in post-natal maturation of mouse beta-cells<sup>56</sup>. It would be of interest to  
308 follow-up on these results and study the connection between aging and *Junb* activity in  
309 mammalian models.

310       Importantly, beta-cells from animals fed three-times-a-day revealed a diversity in their  
311 classification. Notably, 23% of the beta-cells were classified in the younger stage, suggesting  
312 cellular heterogeneity in the aging process. This was additionally observed during the  
313 interpolation analysis (Fig. 1d), in which cells from intermediate time-points classified in the  
314 two adjacent stages. Asynchronous cellular aging in beta-cells was recently hypothesized  
315 using histological analysis<sup>57</sup>. Quantifying the extent of heterogeneity in the aging process  
316 while capturing the mRNA expression profile, made possible by our framework, provides an  
317 exciting opportunity for understanding the molecular underpinnings of heterogeneous cellular  
318 aging.

319       Our machine-learning based framework has high flexibility in its design and  
320 execution, which can be exploited to develop predictive models based on diverse biological  
321 parameters. Moreover, the inputs to the predictor are not limited to mRNA expression levels  
322 but can be extended to include other covariates. With improvements in single cell

323 epigenetics<sup>58</sup>, new models integrating both genetic and epigenetic changes could be built to  
324 improve accuracy and resolution.

325 Our framework is based on the assumption that chronological age provides a useful  
326 metric for the modeling of age. Chronological age is an easily observable fact, and this  
327 provided the ground truth for training and testing our models. The aging trajectory provided  
328 by the use of chronological age served as benchmark for all predictions generated by the  
329 framework. However, chronological age does not always correlate well with development of  
330 disease and mortality<sup>59</sup>. Previous studies have introduced the concept of biological age<sup>60,61</sup>,  
331 a metric that correlates better than chronological age with pathological conditions. However,  
332 the determination of biological age requires training, testing and verification of regression  
333 models. This leads to the biological age being defined as per the computation model, which  
334 can result in very low overlap between different measures of biological age<sup>62</sup>. In the future, it  
335 would be worthwhile to generate two-tier models combining the information from models  
336 based on chronological and biological age.

337 We developed our model with the idea in mind to be able to detect premature aging.  
338 However, individual responses might differ towards the factors that lead to accelerated aging.  
339 For instance, within the population of humans with an obese BMI, the ‘metabolically healthy  
340 obese’ group exhibits lower risk for complications as compared to the ‘metabolically  
341 unhealthy obese’<sup>63,64</sup>. Further work needs to be done to identify individual risk-factors  
342 associated with premature aging. This would be necessary for recommendations of  
343 preventive therapies.

344 The predictors presented in this study are restricted by sequencing platforms and the  
345 specific tissues utilized for training them. This limits their immediate adaptation. The  
346 predictors are built with data generated from Smart-Seq2 sequencing pipeline, which captures  
347 the full-length mRNAs with high transcriptome coverage. The predictor might be unable to  
348 handle the data from Drop-seq or MARS-seq, protocols that sequence the 3’-end of mRNA

349 and provide lower-coverage<sup>42</sup>. Computational efforts for eliminating the idiosyncrasies of  
350 individual platforms<sup>65</sup> would help to remove this restriction. Additionally, the predictors do  
351 not extend beyond the currently described tissues. Investigators interested in the aging of  
352 other cells, for instance muscle, would need to develop and validate *de-novo* predictive  
353 models. Nevertheless, we expect the groundwork presented here to help with the  
354 development of predictive models. Further improvements of our approach could expedite the  
355 identification of age-modifying factors, which are important regulators of development and  
356 disease.

## 357 **CONCLUSION**

358 Here we developed a machine learning based platform that successfully predicts the  
359 chronological stage of individual cells. We show the framework's robustness in handling  
360 multiple sample processing pipelines, time-points that fall between the discrete chronological  
361 stages, and diversity in cell types. The framework's capability to characterize aging factors  
362 was demonstrated through evaluation of the impact of a higher-calorie feeding on beta-cell  
363 aging. The predictive power of the framework was further harnessed to discover *junba* as a  
364 candidate gene that maintains the proliferative beta-cell state, a characteristic trait of younger  
365 beta-cells. Broad applicability of the framework was demonstrated by predictions on the  
366 entire human pancreatic tissue. We anticipate that the robustness and flexibility exhibited  
367 here will enable the development of aging models for multiple tissues, opening the possibility  
368 of detecting premature aging and preventing pathological developments. To maximize the  
369 accessibility and impact of the study, the framework is openly shared on github<sup>66</sup>, and a user-  
370 friendly, graphical interface is provided for generating predictions from trained models.

## 371 **METHODS**

### 372 **Zebrafish strains and husbandry**

373 Wild-type or transgenic zebrafish of the outbred AB, WIK or a hybrid WIK/AB strain  
374 were used in all experiments. Zebrafish were raised under standard conditions at 28°C.  
375 Animals were chosen at random for all experiments. Published transgenic strains used in this  
376 study were *Tg(ins:BB1.0L; cryaa:RFP)*<sup>36</sup>; *Tg(ins:FUCCI-G1)*<sup>s948 51</sup>; *Tg(ins:FUCCI-*  
377 *S/G2/M)*<sup>s946 51</sup>. Experiments were conducted in accordance with the Animal Welfare Act and  
378 with permission of the Landesdirektion Sachsen, Germany (permits AZ 24–9168, TV38/2015,  
379 T12/2016, and T13/2017).

### 380 **Single cell isolation of zebrafish beta-cells**

381 Primary islets from *Tg(ins:BB1.0L; cryaa:RFP)* zebrafish were dissociated into single  
382 cells and sorted using FACS-Aria II (BD Bioscience). Islets were dissociated into single cells  
383 by incubation in TrypLE (ThermoFisher, 12563029) with 0.1% Pluronic F-68 (ThermoFisher,  
384 24040032) at 37 °C in a benchtop shaker set at 450 rpm for 30 min. Following dissociation,  
385 TrypLE was inactivated with 10% FBS, and the cells pelleted by centrifugation at 500g for 10  
386 min at 4 °C. The supernatant was carefully discarded and the pellet re-suspended in 500 uL of  
387 HBSS (without Ca, Mg) + 0.1% Pluronic F-68. To remove debris, the solution was passed  
388 over a 30 µm cell filter (Miltenyi Biotec, 130-041-407). To remove dead cells, calcein violet  
389 (ThermoFisher, C34858) was added at a final concentration of 1 µM and the cell suspension  
390 incubated at room temperature for 20 minutes. The single cell preparation was sorted with the  
391 appropriate gate for identification of beta-cells (RFP+ and calcein+) (Supplementary Fig. S1).  
392 FACS was performed through 100 µm nozzle with index sorting.

### 393 **Single cell mRNA sequencing of zebrafish beta-cells from 96-well plates**



394 Cells were sorted into a 96-well plate containing 2  $\mu$ l of nuclease free water with 0.2%  
395 Triton-X 100 and 4 U murine RNase Inhibitor (NEB), spun down and frozen at  $-80^{\circ}\text{C}$ . After  
396 thawing the samples, 2  $\mu$ l of a primer mix was added (5 mM dNTP (Invitrogen), 0.5  $\mu$ M dT-  
397 primer\*, 4 U RNase Inhibitor (NEB)). RNA was denatured for 3 minutes at  $72^{\circ}\text{C}$  and the  
398 reverse transcription was performed at  $42^{\circ}\text{C}$  for 90 min after filling up to 10  $\mu$ l with RT  
399 buffer mix for a final concentration of 1x superscript II buffer (Invitrogen), 1 M betaine, 5  
400 mM DTT, 6 mM  $\text{MgCl}_2$ , 1  $\mu$ M TSO-primer\*, 9 U RNase Inhibitor and 90 U Superscript II.  
401 After synthesis, the reverse transcriptase was inactivated at  $70^{\circ}\text{C}$  for 15 min. The cDNA was  
402 amplified using Kapa HiFi HotStart Readymix (Peqlab) at a final 1x concentration and 0.1  
403  $\mu$ M UP primer under following cycling conditions: initial denaturation at  $98^{\circ}\text{C}$  for 3 min, 22  
404 cycles [ $98^{\circ}\text{C}$  20 sec,  $67^{\circ}\text{C}$  15 sec,  $72^{\circ}\text{C}$  6 min] and final elongation at  $72^{\circ}\text{C}$  for 5 min. The  
405 amplified cDNA was purified using 1x volume of hydrophobic Sera-Mag SpeedBeads (GE  
406 Healthcare) and DNA was eluted in 12  $\mu$ l nuclease free water. The concentration of the  
407 samples was measured with a Tecan plate reader Infinite 200 pro in 384 well black flat  
408 bottom low volume plates (Corning) using AccuBlue Broad range chemistry (Biotium).

409 For library preparation, 700 pg cDNA in 2  $\mu$ l was mixed with 0.5  $\mu$ l tagmentation  
410 enzyme and 2.5  $\mu$ l Tagment DNA Buffer (Nextera DNA Library Preparation Kit; Illumina)  
411 and tagmented at  $55^{\circ}\text{C}$  for 5 min. Subsequently, Illumina indices were added during PCR  
412 ( $72^{\circ}\text{C}$  3 min,  $98^{\circ}\text{C}$  30 sec, 12 cycles [ $98^{\circ}\text{C}$  10 sec,  $63^{\circ}\text{C}$  20 sec,  $72^{\circ}\text{C}$  1 min],  $72^{\circ}\text{C}$  5 min)  
413 with 1x concentrated KAPA Hifi HotStart Ready Mix and 0.7  $\mu$ M dual indexing primers.  
414 After PCR, libraries were quantified with AccuBlue Broad range chemistry, equimolarly  
415 pooled and purified twice with 1x volume Sera-Mag SpeedBeads. This was followed by  
416 Illumina sequencing on a Nextseq500 aiming at an average sequencing depth of 0.5 million  
417 reads per cell.

418

419 \*dT primer: Aminolinker-AAGCAGTGGTATCAACGCAGAGTCGAC T(30) VN

420 \*TSO primer: AAGCAGTGGTATCAACGCAGAGTACATggg

421 \*UP primer: AAGCAGTGGTATCAACGCAGAGT

## 422 **Single cell mRNA sequencing of zebrafish beta-cells with the C1 system**

423       The C1™ Single-Cell mRNA Seq 10-17 µm IFC (© Fluidigm Corporation, CA, USA)  
424 was used to perform mRNA sequencing on single cells. In general, the protocol (PN 100-7168  
425 L1) suggested by the manufacturer was followed, with some modifications. 1200 cells in PBS  
426 were directly sorted by FACS into the inlet, mixed 3:2 with suspension reagent, resulting in a  
427 final volume of 6 µl. Cells were loaded with the mRNAseq: Cell load protocol, without  
428 staining on the IFC. For RT and amplification, the mRNA Seq: RT & Amp script was run  
429 with the following cycling parameters: 1x 98°C 1 min, 5x (95°C 20-45 sec, 59-49°C with  
430 0.3°C increment/cycle 4 min, 68°C 6 min) 9x (95°C 20-45 sec, 65-49°C with 0.3°C  
431 increment/cycle 30 sec, 68°C 6 min) 7x (95°C 30-45 sec, 65-49°C with 0.3°C increment/cycle  
432 30 sec, 68°C 7 min) and 72°C 10 min using SMART-Seq v4 Ultra Low Input RNA Kit for  
433 Sequencing (Takara BIO USA, INC.). For library preparation, 2 µl cDNA were mixed with  
434 0.5 µl tagmentation enzyme and 2.5 µl Tagment DNA Buffer (Nextera DNA Library  
435 Preparation Kit; Illumina) and tagmented at 55°C for 5 min. Illumina indices were added by  
436 PCR with the following cycling conditions: 1x (72°C 3 min, 98°C 30 sec), 12 x (98°C 10 sec,  
437 63°C 20 sec, 72°C 1 min), 1x (72°C 5 min), using KAPA Hifi HotStart Ready Mix and 0.7  
438 µM final dual indexing primers. Libraries were quantified, equimolarly pooled and purified  
439 twice with 1x volume Sera-Mag SpeedBeads. Illumina sequencing (75bp SE) was done on a  
440 Nextseq500 aiming to achieve an average sequencing depth of 0.5 million reads per cell.

## 441 **Mapping of read counts and quality control**

442 Raw reads in fastq format were trimmed using trim-galore with default parameters to  
443 remove adapter sequences. Trimmed reads were aligned to the zebrafish genome, GRCz10,  
444 using HISAT2<sup>67</sup> with default parameters. htseq-count<sup>68</sup> was used to assign reads to exons  
445 thus eventually getting counts per gene. Using cells that were utilized for developing  
446 zebrafish GERAS (see next section), the following quality control parameters were obtained  
447 (Supplementary Fig. S2):

- 448 1. The median and median absolute deviation (MAD) for total reads
- 449 2. The median and MAD for % of mitochondrial reads
- 450 3. The median and MAD for % spike-ins
- 451 4. Number of detectable genes

452 Cells passed quality control if they belonged to median  $\pm$  3\*MAD bracket for 1-3 and  
453 contained more than 1500 genes. Read counts for all cells that passed quality control are  
454 available at: <https://sharing.crt-dresden.de/index.php/s/zcQ14AMGJAevokU>.

#### 455 **Pseudotemporal ordering of zebrafish beta-cells**

456 Unsupervised pseudotemporal ordering of zebrafish beta-cells was carried out using  
457 the read counts from beta-cells isolated from seven different ages. The cells were grouped in  
458 three stages before analysis: ‘Juvenile’ (1 mpf), ‘Adolescent’ (3, 4, 6 mpf) and ‘Young’ (10,  
459 12, 14 mpf). Ordering was carried out using Monocle<sup>16</sup>, as outlined in the vignette for  
460 Monocle2. The analysis is shared online as [Monocle.R](#).

#### 461 **Development of GERAS for zebrafish beta-cells**

462 For development of GERAS for zebrafish beta-cells, read counts were used from  
463 seven ages of zebrafish: 1 mpf, 3 mpf, 4 mpf, 6 mpf, 10 mpf, 12 mpf and 14 mpf. The 3 mpf  
464 and 6 mpf stages contained two batches of beta-cells collected and sequenced on different

465 days. Each batch of cells originated from six zebrafish. Read counts were normalized to  
466 transcripts per million (TPM) using the formula:

$$Transcript_{gc} = \frac{Read\ Count_{gc}}{Length\ in\ kb_g}$$

$$TPM_{gc} = \frac{Transcript_{gc}}{\sum_g Transcript_c} * 1,000,000$$

467 where for gene  $g$  and cell  $c$ ,  $Transcript_{gc}$  are the number of transcripts calculated by dividing  
468 the read counts to the length of the gene in kb, and TPM is the proportion of the gene's  
469 transcripts among per million of total cellular transcripts.

470 The entire dataset containing 508 beta-cells were randomly divided into 80%-20%  
471 train-test set. Genes were sorted in descending order according to their expression variability  
472 (calculated by 'median absolute deviation') in the entire dataset. The top 1000 most variable  
473 genes were used for developing a four-layer fully connected neural network (Fig. 1a). The  
474 neural network contained two hidden layers with rectified linear unit (ReLU) activation  
475 function, and a softmax output layer. The network was trained to classify the pancreatic cells  
476 into three chronological ages: Juvenile (1 month post-fertilization (mpf)), Adolescent (3, 4  
477 and 6 mpf) and Adult (10, 12 and 14 mpf). During training, a five-fold cross-validation was  
478 repeated three times over a grid of values for regularization hyperparameters: dropout  
479 frequency (0.4 to 0.9 in steps of 0.1) and regularization constant (0.4 to 1.6 in steps of 0.2).  
480 The combination with the highest cross-validation accuracy was taken as the optimal value,  
481 and a final model was trained using the entire training set and the optimal regularization  
482 hyperparameters. The entire network was implemented in R using TensorFlow API. An  
483 Rmarkdown report detailing the development of zebrafish beta-cell GERAS is available at  
484 [https://github.com/sumeetpalsingh/GERAS2017/blob/master/GERAS\\_Tf\\_Zf.html](https://github.com/sumeetpalsingh/GERAS2017/blob/master/GERAS_Tf_Zf.html)<sup>66</sup>.

485 The trained model was used to predict the chronological age of the test set. Accuracy

486 was calculated as the proportion of cells for which the prediction matched the chronological  
487 age. By considering each prediction as a binomial distribution (a ‘Juvenile’ cell can be  
488 classified as ‘Juvenile’ or ‘Not Juvenile’), the standard error was calculated using the  
489 following formula:

$$\text{Standard error} = \sqrt{\frac{\text{accuracy} * (1 - \text{accuracy})}{n}}$$

490 where  $n$  is the number of cells tested.

#### 491 **Prediction of chronological age using GERAS for zebrafish beta-cells**

492 For external validation (4 mpf and 3 mpf C1-sample) and interpolation (1.5 mpf and 9  
493 mpf), new batches of zebrafish beta-cells were isolated in 96-well plates and sequenced.  
494 Quality controlled raw counts were obtained as outlined above. The raw counts were  
495 normalized to TPM values, which were then used to predict the chronological stage using pre-  
496 trained GERAS. Results were depicted as balloonplots, where a grid contains dots whose size  
497 reflects the percentage of cells classified in the corresponding group.

#### 498 **Assessing the impact of calories on the chronological age of zebrafish beta-cells using** 499 **GERAS**

500 Twelve zebrafish at 3 mpf from the same clutch were separated into two groups of 6  
501 animals each. Both groups were fed with their normal feed of freshly hatched *Artemia* (brine  
502 shrimp). The intermittent feeding group was fed on alternate day, while the other group was  
503 fed three times daily with intervals of at least two hours between the feedings. Amount of  
504 food eaten by each animal was not controlled. After a month, the beta-cells were isolated into  
505 96-well plates using FACS. The cells were processed and sequenced together. TPM-  
506 normalized counts from the cells were used to predict the chronological age using GERAS.

#### 507 **Correlation analysis and gene ontology (GO) analysis**

508 Correlation analysis was carried out for beta-cells collected from the three-times-a-day  
509 animals. These beta-cells classified in ‘Adolescent’ and ‘Adult’ stage (Fig. 2a). The analysis  
510 calculated the correlation between the probability of a cell to be classified in the younger  
511 (‘Adolescent’) stage and the mRNA expression of genes. To obtain the classification  
512 probability, the softmax for the ‘Adolescent’ stage was calculated from the output layer of  
513 GERAS (Fig. S5). For this, a function (`model_softmax`) was written that takes the log2-  
514 transformed normalized values of single cells, performs forward propagation through GERAS  
515 till the softmax layer, and returns the output. The output contains the probability for the  
516 particular cell to classify in all the three stages (‘Juvenile’, ‘Adolescent’, and ‘Adult’). The  
517 function is deposited as [source/model\\_softmax.R](#)<sup>66</sup>. The probability for ‘Adolescent’ stage  
518 was extracted from this output.

519 Correlation coefficient was calculating using the `cor(classification probability, gene`  
520 `expression)` function in R. The calculation was restricted to genes expressed in more than 10%  
521 of the cells (11,570 genes). This gave a correlation value for each gene expressed in beta-cells  
522 from three-times-a-day animals. The values were sorted in ascending order and plotted in Fig.  
523 2b. The genes with the highest positive correlation were identified as the top fifth-percentile,  
524 and the genes with the highest negative correlation were identified as the lowest fifth-  
525 percentile. These genes were further used for unbiased gene ontology (GO) analysis using  
526 DAVID<sup>44</sup>. As background for GO analysis, the list of expressed genes was used.

### 527 **Construction of the *ins:nls-BFP-T2A-DN-junba*; *cryaa:RFP* plasmid**

528 To generate *ins:nls-BFP-T2A-DN-junba*; *cryaa:RFP*, a vector was created by  
529 inserting multiple cloning sites (MCS) downstream of the insulin promoter to yield *ins:MCS*;  
530 *cryaa:RFP*. To do so, the plasmid *ins:mAG-zGeminin*; *cryaa:RFP* was digested with  
531 EcoRI/PacI and ligated with dsDNA generated by annealing two primers harboring the sites  
532 EcoRV, NheI, NsiI, Sall and flanked by EcoRI/PacI overhangs. The plasmid pUC-Kan

533 consisting of the DN-junba (junba<sup>157-325</sup>, consisting of only the DNA binding domain<sup>69</sup>) fused  
534 to *nls-BFP* via T2A sequence flanked by EcoRI/PacI sites was synthesized from GenScript.  
535 *ins:MCS;cryaa:RFP* and the plasmid *pUC-nls-BFP-T2A-DN-junba* were subsequently  
536 digested with EcoRI/PacI to yield compatible fragments, which were ligated together to yield  
537 the final construct. The entire construct was flanked with I-SceI sites to facilitate genomic  
538 insertion.

### 539 **Analysis of proliferation using mosaic expression of DN-junba**

540 To identify proliferating beta-cells, the zebrafish beta-cell specific FUCCI system<sup>51</sup>  
541 was used by crossing *Tg(ins:FUCCI-G1)* with *Tg(ins:FUCCI-S/G2/M)*. Embryos obtained  
542 from the mating were injected with *ins:nls-BFP-T2A-DN-junba;cryaa:RFP* plasmid, along  
543 with I-SceI, to facilitate mosaic integration into the genome. At 30 dpf, animals were  
544 euthanized in Tricaine and dissected to isolate the islets. The isolated islets were fixed in 4%  
545 paraformaldehyde (PFA) for 48 hours at 4°C, washed multiple times in PBS and mounted on  
546 slides for confocal microscopy. Confocal images were used for cell-counting. All the  
547 *Tg(ins:FUCCI-S/G2/M)*-positive cells (green fluorescence only) were counted manually  
548 within the BFP-positive and BFP-negative clones. Using Imaris (Bitplane), the total number  
549 of BFP-positive and beta-cells were calculated in the entire islet. For this, the “spots” function  
550 was used after thresholding. For calculating percentages (%), the following calculations were  
551 used:

$$\text{Total BFP-negative cells} = \text{Total beta-cells} - \text{Total BFP-positive cells}$$

$$\% \text{ BFP-positive proliferating cells}$$

$$= \frac{\text{ins:FUCCI-S/G2/M-positive and BFP-positive cells}}{\text{Total BFP-positive cells}} * 100$$

% BFP-negative proliferating cells

$$= \frac{\text{ins:FUCCI-S/G2/M-positive and BFP-negative cells}}{\text{Total BFP-negative cells}} * 100$$

## 552 **Statistical analysis**

553 Statistical analysis was performed using R. No animals were excluded from analysis.  
554 Blinding was not performed during analysis. Analysis of normal distribution was performed.  
555 To compare chronological age (Adolescent versus Adult) between beta-cell from intermittent  
556 feeding and three-times a day fed animals, Fisher's exact test for count data (fisher.test(x =  
557 2X2 matrix, alternative = "two.sided")) was performed. To compare the expression levels of  
558 *junba* and *fosab* between Juvenile, Adolescent and Adult, ANOVA followed by Tukey's range  
559 test (fit <- aov(Expression ~ Stage); TukeyHSD(fit)) was performed. To compare the  
560 proliferation between *DN-junba* expressing cells with control cells, an unpaired two-tailed t-  
561 test with unequal variance (t.test (x = dataframe, alternative = "two.sided", paired = FALSE,  
562 var.equal = FALSE)) was used to calculate p-values. A p-value of less than 0.05 was  
563 considered statistically significant.

## 564 **Development of GERAS for human pancreatic cells**

565 For development of GERAS for human pancreatic cells, read counts from Enge et al.<sup>27</sup>  
566 were obtained from GEO: [GSE81547](https://www.ncbi.nlm.nih.gov/geo/query/acc.cgi?acc=GSE81547). Read counts were normalized to reads per million  
567 (RPM) using the formula:

$$RPM_{gc} = \frac{\text{Read Count}_{gc}}{\sum \text{Read Count}_c} * 1,000,000$$

568 where for gene *g* and cell *c*,  $RPM_{gc}$  is the proportion of the gene's reads among per million of  
569 the total cellular reads.

570 The entire dataset containing 2544 pancreatic cells was randomly divided into 80%-  
571 20% train-test set. Genes were sorted in descending order according to their expression



572 variability (calculated by ‘median absolute deviation’) in the entire dataset. The top 1000  
573 most variable genes were used for developing a four-layer fully connected neural network  
574 (Fig. 4a). The neural network contained two hidden layers with ReLU activation function, and  
575 a softmax output layer. The network was trained to classify the pancreatic cells into three  
576 chronological ages: Juvenile (1 month, 5 and 6 years), Young (21 and 22 years), and Middle  
577 (38, 44 and 54 years). During training, a five-fold cross-validation was repeated three times  
578 over a grid of values for regularization hyperparameters: dropout frequency (0.4 to 0.9 in  
579 steps of 0.1) and regularization constant (0.2 to 1.2 in steps of 0.2). The combination with the  
580 highest cross-validation accuracy was taken as the optimal value, and a final model was  
581 trained using the entire training set and the optimal regularization hyperparameters. The entire  
582 network was implemented in R using TensorFlow API. An Rmarkdown report detailing the  
583 development of human pancreatic GERAS is available at  
584 [https://github.com/sumeetpalsingh/GERAS2017/blob/master/GERAS\\_Tf\\_Hs.html](https://github.com/sumeetpalsingh/GERAS2017/blob/master/GERAS_Tf_Hs.html)<sup>66</sup>.

585 The trained model was used to predict the chronological age of the test set. Accuracy  
586 was calculated as the proportion of cells for which the prediction matched the chronological  
587 age. By considering each prediction as a binomial distribution (a ‘Middle’ cell can be  
588 classified as ‘Middle’ or ‘Not Middle’), the standard error was calculated using the following  
589 formula:

$$\text{Standard error} = \sqrt{\frac{\text{accuracy} * (1 - \text{accuracy})}{n}}$$

590 where  $n$  is the number of cells tested.

591 To calculate the accuracy and standard error per cell type, the expression levels of the  
592 following cell-specific markers were extracted for each cell: ‘INS’ (beta-cell), ‘GCG’ (alpha-  
593 cell), ‘SST’ (delta), ‘PRSS1’ (acinar) and ‘KRT19’ (ductal). A cell was classified if the  
594 expression value of any cell-specific marker exceeded 50 RPM, else it was classified as

595 ‘Others’. For classification, the cell-type marker with the highest expression determined the  
596 cell type. Thus, a (theoretical) cell with RPM values of 1000 INS, 3 GCG, 4 SST, 0 PRSS1, 0  
597 KRT19 was classified as beta-cell, while another (theoretical) cell with RPM values of 3 INS,  
598 5 GCG, 7 SST, 1777 PRSS1, 9 KRT19 was classified as acinar cell. Cell-type specific cells  
599 present in the test set were used to calculate the accuracy per cell-type.

## 600 **Independent cohort of human pancreatic cells**

601 For testing GERAS with external data, read counts of pancreatic single-cell data from  
602 Segerstolpe et al.<sup>53</sup> were obtained from ArrayExpress (EBI) with accession number: [E-  
603 MTAB-5061](#). The publication contained data from six healthy individuals. The entire data  
604 was stratified according to the individuals, and cells from each individual that passed quality-  
605 control according to Segerstolpe et al. were used for further analysis. Read counts from the  
606 cells were normalized to RPM for input to GERAS.

## 607 **Calculating classification probability for ‘Middle’ (38 – 54 years) stage**

608 To calculate the probability that a particular cell would be classified to the ‘Middle’  
609 stage, the softmax for the ‘Middle’ stage was calculated from the output layer of human  
610 pancreatic GERAS. For this, the function `model_softmax` was provided with the log2-  
611 transformed RPM values and used to calculate the probability for the particular cell to classify  
612 in all the three stages (‘Juvenile’, ‘Young’, and ‘Middle’). The probability for ‘Middle’ stage  
613 was extracted from this output.

## 614 **Prediction of chronological age using GERAS for human pancreatic cells**

615 For predicting the chronological stage of cells belonging to individuals of age 22, 23,  
616 43 and 48 years, RPM values from each individual were used as input to human pancreatic  
617 GERAS. Results were depicted as balloonplots, where a grid contains dots whose size reflects  
618 the percentage of cells classified in the corresponding group.

## 619 **Calculating variable importance for GERAS**

620 Variable importance was calculated as outlined in Gedeon et al.<sup>70</sup>. The code for  
621 carrying out the calculation is shared as [source/variableImportance.R](#)<sup>66</sup>. The code uses the  
622 weights of the trained neural network to calculate the importance of each variable (input) used  
623 for classification. The output is scaled to 0 (least important) and 1 (most important). This was  
624 used to identify the importance of each gene used in zebrafish and human GERAS. The  
625 results were sorted in descending order for plotting. Additionally, the top 20 most important  
626 genes were obtained from the sorted list, and their relative importance calculated using the  
627 formula,

$$Relative\ Importance_g = \frac{Importance_g}{\sum_g Importance}$$

628 where  $g$  denotes an individual gene among the top 20. The disease association for each gene  
629 was obtained from DisGeNET database<sup>71</sup>. From the database, an association with a score of  
630 greater than or equal to 0.2 was reported.

## 631 **Shiny implementation of GERAS predictor**

632 To enable easy access to predictions using GERAS, a Shiny app was developed. The  
633 app is freely available at  
634 [https://github.com/sumeetpalsingh/GERAS2017/shiny\\_GERAS\\_Tf.R](https://github.com/sumeetpalsingh/GERAS2017/shiny_GERAS_Tf.R)<sup>66</sup>. The app provides a  
635 graphic-user interface (GUI) for users to make chronological age predictions using a pre-  
636 trained GERAS model. The users can upload normalized counts, verify the uploaded data, and  
637 obtain predictions in a downloadable comma-separated (csv) file.

## 638 **Data availability**

639 The raw datasets, along with tabulated count data and TPM normalized values,  
640 generated during the current study are available from GEO under accession number

641 [GSE109881](https://www.ncbi.nlm.nih.gov/geo/query/acc.cgi?acc=GSE109881), with the token number ixkzakssxnsjtaf. The data will be made public upon  
642 publication. Normalized read-counts for all human pancreatic samples used in the study are  
643 available at: <https://sharing.crt-dresden.de/index.php/s/zcQ14AMGJAevokU>, and codes for  
644 developing and testing GERAS are available at  
645 <https://github.com/sumeetpalsingh/GERAS2017><sup>66</sup>. Please refer to README.md to navigate  
646 the Github folder. The authors welcome any requests for information on the raw data, data  
647 processing, GERAS development and utilization.

648

## 649 **References**

- 650 1. Kowalczyk, M. S. *et al.* Single-cell RNA-seq reveals changes in cell cycle and  
651 differentiation programs upon aging of hematopoietic stem cells. *Genome Res.* **25**,  
652 1860–1872 (2015).
- 653 2. Peters, M. J. *et al.* The transcriptional landscape of age in human peripheral blood. *Nat.*  
654 *Commun.* **6**, 8570 (2015).
- 655 3. Szilard, L. On the nature of the aging process. *Proc. Natl. Acad. Sci. U. S. A.* **45**, 30–45  
656 (1959).
- 657 4. Vijg, J. Somatic mutations and aging: a re-evaluation. *Mutat. Res. Mol. Mech.*  
658 *Mutagen.* **447**, 117–135 (2000).
- 659 5. Pal, S. & Tyler, J. K. Epigenetics and aging. *Sci. Adv.* **2**, e1600584–e1600584 (2016).
- 660 6. Barzilai, N., Huffman, D. M., Muzumdar, R. H. & Bartke, A. The Critical Role of  
661 Metabolic Pathways in Aging. *Diabetes* **61**, 1315–1322 (2012).
- 662 7. López-Otín, C., Blasco, M. A., Partridge, L., Serrano, M. & Kroemer, G. The  
663 Hallmarks of Aging. *Cell* **153**, 1194–1217 (2013).
- 664 8. Kenyon, C. J. The genetics of ageing. *Nature* **464**, 504–512 (2010).
- 665 9. Piper, M. D. W. & Bartke, A. Diet and Aging. *Cell Metab.* **8**, 99–104 (2008).
- 666 10. Most, J., Tosti, V., Redman, L. M. & Fontana, L. Calorie restriction in humans: An  
667 update. *Ageing Res. Rev.* **39**, 36–45 (2017).
- 668 11. Köks, S. *et al.* Mouse models of ageing and their relevance to disease. *Mech. Ageing*  
669 *Dev.* **160**, 41–53 (2016).

- 670 12. Wang, Y. & Navin, N. E. Advances and Applications of Single-Cell Sequencing  
671 Technologies. *Mol. Cell* **58**, 598–609 (2015).
- 672 13. Marco, E. *et al.* Bifurcation analysis of single-cell gene expression data reveals  
673 epigenetic landscape. *Proc. Natl. Acad. Sci. U. S. A.* **111**, E5643-50 (2014).
- 674 14. Haghverdi, L., Büttner, M., Wolf, F. A., Buettner, F. & Theis, F. J. Diffusion  
675 pseudotime robustly reconstructs lineage branching. *Nat. Methods* **13**, 845–8 (2016).
- 676 15. Setty, M. *et al.* Wishbone identifies bifurcating developmental trajectories from single-  
677 cell data. *Nat. Biotechnol.* **34**, 637–45 (2016).
- 678 16. Trapnell, C. *et al.* The dynamics and regulators of cell fate decisions are revealed by  
679 pseudotemporal ordering of single cells. *Nat. Biotechnol.* **32**, 381–386 (2014).
- 680 17. Schiebinger, G. *et al.* Reconstruction of developmental landscapes by optimal-transport  
681 analysis of single-cell gene expression sheds light on cellular reprogramming. *bioRxiv*  
682 doi:10.1101/191056 (2017). doi:10.1101/191056
- 683 18. Reid, J. E. & Wernisch, L. Pseudotime estimation: deconfounding single cell time  
684 series. *Bioinformatics* **32**, 2973–2980 (2016).
- 685 19. Semrau, S. *et al.* Dynamics of lineage commitment revealed by single-cell  
686 transcriptomics of differentiating embryonic stem cells. *Nat. Commun.* **8**, 1096 (2017).
- 687 20. Chu, L.-F. *et al.* Single-cell RNA-seq reveals novel regulators of human embryonic  
688 stem cell differentiation to definitive endoderm. *Genome Biol.* **17**, 173 (2016).
- 689 21. Moignard, V. *et al.* Decoding the regulatory network of early blood development from  
690 single-cell gene expression measurements. *Nat. Biotechnol.* **33**, 269–276 (2015).
- 691 22. Ocone, A., Haghverdi, L., Mueller, N. S. & Theis, F. J. Reconstructing gene regulatory

- 692 dynamics from high-dimensional single-cell snapshot data. *Bioinformatics* **31**, i89-96  
693 (2015).
- 694 23. Thattai, M. & van Oudenaarden, A. Intrinsic noise in gene regulatory networks. *Proc.*  
695 *Natl. Acad. Sci.* **98**, 8614–8619 (2001).
- 696 24. Raj, A., Peskin, C. S., Tranchina, D., Vargas, D. Y. & Tyagi, S. Stochastic mRNA  
697 synthesis in mammalian cells. *PLoS Biol.* **4**, 1707–1719 (2006).
- 698 25. Battich, N., Stoeger, T. & Pelkmans, L. Control of Transcript Variability in Single  
699 Mammalian Cells. *Cell* **163**, 1596–1610 (2015).
- 700 26. Stoeger, T., Battich, N. & Pelkmans, L. Passive Noise Filtering by Cellular  
701 Compartmentalization. *Cell* **164**, 1151–1161 (2016).
- 702 27. Enge, M. *et al.* Single-Cell Analysis of Human Pancreas Reveals Transcriptional  
703 Signatures of Aging and Somatic Mutation Patterns. *Cell* **171**, 321–330.e14 (2017).
- 704 28. Martinez-Jimenez, C. P. *et al.* Aging increases cell-to-cell transcriptional variability  
705 upon immune stimulation. *Science.* **355**, 1433–1436 (2017).
- 706 29. Eldar, A. & Elowitz, M. B. Functional roles for noise in genetic circuits. *Nature* **467**,  
707 167–173 (2010).
- 708 30. Dueck, H., Eberwine, J. & Kim, J. Variation is function: Are single cell differences  
709 functionally important?: Testing the hypothesis that single cell variation is required for  
710 aggregate function. *Bioessays* **38**, 172–80 (2016).
- 711 31. Kolodziejczyk, A. A., Kim, J. K., Svensson, V., Marioni, J. C. & Teichmann, S. A. The  
712 Technology and Biology of Single-Cell RNA Sequencing. *Mol. Cell* **58**, 610–620  
713 (2015).

- 714 32. Grün, D. *et al.* Single-cell messenger RNA sequencing reveals rare intestinal cell types.  
715 *Nature* **525**, 251–5 (2015).
- 716 33. Papalexi, E. & Satija, R. Single-cell RNA sequencing to explore immune cell  
717 heterogeneity. *Nat. Rev. Immunol.* (2017). doi:10.1038/nri.2017.76
- 718 34. Bader, E. *et al.* Identification of proliferative and mature  $\beta$ -cells in the islets of  
719 Langerhans. *Nature* **535**, 430–4 (2016).
- 720 35. Dorrell, C. *et al.* Human islets contain four distinct subtypes of  $\beta$  cells. *Nat. Commun.*  
721 **7**, 11756 (2016).
- 722 36. Singh, S. P. *et al.* Different developmental histories of beta-cells generate functional  
723 and proliferative heterogeneity during islet growth. *Nat. Commun.* **8**, 664 (2017).
- 724 37. Halpern, K. B. *et al.* Single-cell spatial reconstruction reveals global division of labour  
725 in the mammalian liver. *Nature* **542**, 352–356 (2017).
- 726 38. de Magalhães, J. P., Curado, J. & Church, G. M. Meta-analysis of age-related gene  
727 expression profiles identifies common signatures of aging. *Bioinformatics* **25**, 875–881  
728 (2009).
- 729 39. Glass, D. *et al.* Gene expression changes with age in skin, adipose tissue, blood and  
730 brain. *Genome Biol.* **14**, R75 (2013).
- 731 40. Gregg, B. E. *et al.* Formation of a human  $\beta$ -cell population within pancreatic islets is  
732 set early in life. *J. Clin. Endocrinol. Metab.* **97**, 3197–206 (2012).
- 733 41. Gunasekaran, U. & Gannon, M. Type 2 diabetes and the aging pancreatic beta cell.  
734 *Aging (Albany, NY)*. **3**, 565–75 (2011).
- 735 42. Ziegenhain, C. *et al.* Comparative Analysis of Single-Cell RNA Sequencing Methods.



- 736 *Mol. Cell* **65**, 631–643.e4 (2017).
- 737 43. Oka, T. *et al.* Diet-induced obesity in zebrafish shares common pathophysiological  
738 pathways with mammalian obesity. *BMC Physiol.* **10**, 21 (2010).
- 739 44. Huang, D. *et al.* The DAVID Gene Functional Classification Tool: a novel biological  
740 module-centric algorithm to functionally analyze large gene lists. *Genome Biol.* **8**,  
741 R183 (2007).
- 742 45. Li, W., Hoffman, P. N., Stirling, W., Price, D. L. & Lee, M. K. Axonal transport of  
743 human  $\alpha$ -synuclein slows with aging but is not affected by familial Parkinson's  
744 disease-linked mutations. *J. Neurochem.* **88**, 401–410 (2003).
- 745 46. Milde, S., Adalbert, R., Elaman, M. H. & Coleman, M. P. Axonal transport declines  
746 with age in two distinct phases separated by a period of relative stability. *Neurobiol.*  
747 *Aging* **36**, 971–981 (2015).
- 748 47. Meynial-Denis, D. Glutamine metabolism in advanced age. *Nutr. Rev.* **74**, 225–36  
749 (2016).
- 750 48. McIsaac, R. S., Lewis, K. N., Gibney, P. A. & Buffenstein, R. From yeast to human:  
751 exploring the comparative biology of methionine restriction in extending eukaryotic  
752 life span. *Ann. N. Y. Acad. Sci.* **1363**, 155–70 (2016).
- 753 49. Hassa, P. O., Haenni, S. S., Elser, M. & Hottiger, M. O. Nuclear ADP-Ribosylation  
754 Reactions in Mammalian Cells: Where Are We Today and Where Are We Going?  
755 *Microbiol. Mol. Biol. Rev.* **70**, 789–829 (2006).
- 756 50. Sikora, E., Kamińska, B., Radziszewska, E. & Kaczmarek, L. Loss of transcription  
757 factor AP-1 DNA binding activity during lymphocyte aging in vivo. *FEBS Lett.* **312**,  
758 179–82 (1992).

- 759 51. Ninov, N. *et al.* Metabolic regulation of cellular plasticity in the pancreas. *Curr. Biol.*  
760 **23**, 1242–1250 (2013).
- 761 52. Sakaue-Sawano, A. *et al.* Visualizing spatiotemporal dynamics of multicellular cell-  
762 cycle progression. *Cell* **132**, 487–98 (2008).
- 763 53. Segerstolpe, Å. *et al.* Single-Cell Transcriptome Profiling of Human Pancreatic Islets  
764 in Health and Type 2 Diabetes. *Cell Metab.* 593–607 (2016).  
765 doi:10.1016/j.cmet.2016.08.020
- 766 54. Kulas, J. A., Puig, K. L. & Combs, C. K. Amyloid precursor protein in pancreatic  
767 islets. *J. Endocrinol.* **235**, 49–67 (2017).
- 768 55. van den Brink, S. C. *et al.* Single-cell sequencing reveals dissociation-induced gene  
769 expression in tissue subpopulations. *Nat. Methods* **14**, 935–936 (2017).
- 770 56. Zeng, C. *et al.* Pseudotemporal Ordering of Single Cells Reveals Metabolic Control of  
771 Postnatal  $\beta$  Cell Proliferation. *Cell Metab.* **25**, 1160–1175.e11 (2017).
- 772 57. Aguayo-Mazzucato, C. *et al.*  $\beta$  Cell Aging Markers Have Heterogeneous Distribution  
773 and Are Induced by Insulin Resistance. *Cell Metab.* **25**, 898–910.e5 (2017).
- 774 58. Buenrostro, J. D. *et al.* Single-cell chromatin accessibility reveals principles of  
775 regulatory variation. *Nature* **523**, 486–490 (2015).
- 776 59. Lowsky, D. J., Olshansky, S. J., Bhattacharya, J. & Goldman, D. P. Heterogeneity in  
777 healthy aging. *J. Gerontol. A. Biol. Sci. Med. Sci.* **69**, 640–9 (2014).
- 778 60. Jylhävä, J., Pedersen, N. L. & Hägg, S. Biological Age Predictors. *EBioMedicine* **21**,  
779 29–36 (2017).
- 780 61. Petkovich, D. A. *et al.* Using DNA Methylation Profiling to Evaluate Biological Age

- 781 and Longevity Interventions. *Cell Metab.* **25**, 954–960.e6 (2017).
- 782 62. Belsky, D. W. *et al.* Telomere, epigenetic clock, and biomarker-composite  
783 quantifications of biological aging: Do they measure the same thing? *bioRxiv*  
784 doi:10.1101/071373 (2016). doi:10.1101/071373
- 785 63. Stefan, N., Häring, H.-U. & Schulze, M. B. Metabolically healthy obesity: the low-  
786 hanging fruit in obesity treatment? *lancet. Diabetes Endocrinol.* (2017).  
787 doi:10.1016/S2213-8587(17)30292-9
- 788 64. Roberson, L. L. *et al.* Beyond BMI: The ‘Metabolically healthy obese’ phenotype & its  
789 association with clinical/subclinical cardiovascular disease and all-cause mortality -- a  
790 systematic review. *BMC Public Health* **14**, 14 (2014).
- 791 65. Butler, A. & Satija, R. Integrated analysis of single cell transcriptomic data across  
792 conditions, technologies, and species. *bioRxiv* doi: 10.1101/164889 (2017).  
793 doi:10.1101/164889
- 794 66. Singh, S. P. GERAS (GEnetic Referene for Age of Single-cell). (2017)  
795 <https://github.com/sumeetpalsingh/GERAS2017>.
- 796 67. Kim, D., Langmead, B. & Salzberg, S. L. HISAT: a fast spliced aligner with low  
797 memory requirements. *Nat. Methods* **12**, 357–360 (2015).
- 798 68. Anders, S., Pyl, P. T. & Huber, W. HTSeq--a Python framework to work with high-  
799 throughput sequencing data. *Bioinformatics* **31**, 166–169 (2015).
- 800 69. Castellazzi, M. *et al.* Overexpression of c-jun, junB, or junD affects cell growth  
801 differently. *Proc. Natl. Acad. Sci. U. S. A.* **88**, 8890–4 (1991).
- 802 70. Gedeon, T. D. Data mining of inputs: analysing magnitude and functional measures.

803 *Int. J. Neural Syst.* **8**, 209–18 (1997).

804 71. Piñero, J. *et al.* DisGeNET: a comprehensive platform integrating information on  
805 human disease-associated genes and variants. *Nucleic Acids Res.* **45**, D833–D839  
806 (2017).

807

808

809 **Acknowledgements:** We thank members of the Ninov lab for comments on the manuscript,  
810 members of Center for Regenerative Therapies Dresden (CRTD) fish, microscopy,  
811 sequencing and FACS facility for technical assistance. We are grateful to Priyanka Oberoi for  
812 illustrations.

813

814 **Authors' Contributions:** S.P.S. and Ankit Sharma (Google, N.Y.) conceptualized the  
815 project. S.P.S. and S.J. performed the zebrafish experiments. S.R., S.D. and A.E. performed  
816 single-cell sequencing. S.P.S., H.B., S.K., and G.Z. developed GERAS and its Shiny app.  
817 S.C., J.E.R. and N.N. provided critical feedback and advice. S.P.S., S.C. and N.N. wrote the  
818 manuscript. N.N. obtained key funding for the project. All authors read and approved the  
819 final manuscript.

820

821 **Funding:** The project was in part supported by CRTD postdoctoral seed grant (CRTD - FZ  
822 111) to S.P.S. and A.E. N.N. is supported by funding from the DFG—Center for  
823 Regenerative Therapies Dresden, Cluster of Excellence at TU-Dresden and the German  
824 Center for Diabetes Research (DZD), as well as research grants from the German Research  
825 Foundation (DFG) (NI 1495/2-1), the European Foundation for the Study of Diabetes (EFSD)  
826 and the DZD.

827

828 **Competing Interests:** The authors declare no competing financial interests.

829

830 **ADDITIONAL FILES**

831 **Supplementary Figures (.pdf)**

832 Containing Supplementary Fig. S1-S9.

833

834 **Table S1: Variable Importance for zebrafish beta-cell GERAS (.xls)**

835 A table listing the 1000-input genes utilized by zebrafish beta-cell GERAS and their  
836 importance towards successful classification.

837

838 **Table S2: Genes negatively correlated with classification probability (.xls)**

839 For beta-cells from three-times-a-day fed animals, correlation analysis was performed. In the  
840 analysis, correlation coefficient was calculated between the probability to be classified in  
841 ‘Adolescent’ stage and gene expression. The genes were ranked in descending order of  
842 correlation coefficient. The table contains the genes in the bottom 5<sup>th</sup> percentile.

843

844 **Table S3: Genes positively correlated with classification probability (.xls)**

845 For beta-cells from three-times-a-day fed animals, correlation analysis was performed. In the  
846 analysis, correlation coefficient was calculated between the probability to be classified in  
847 ‘Adolescent’ stage and gene expression. The genes were ranked in descending order of  
848 correlation coefficient. The table contains the genes in the top 5<sup>th</sup> percentile.

849

850 **Table S4: Variable Importance for Human pancreatic GERAS (.xls)**

851 A table listing the 1000-input genes utilized by human pancreatic GERAS and their  
852 importance towards successful classification.

853

854

855

856 **Figure Legends**

857

858 **Figure 1: A Chronological age classifier for zebrafish beta-cells**

859 (a) A schematic of the machine learning framework for predicting the chronological age of  
860 zebrafish beta-cells based on single-cell transcriptome (see Online Methods for details).

861 (b) Barplot showing the accuracy of GERAS for classifying the age of beta-cells that were  
862 excluded during the training of the model. The predictions on the excluded beta-cells  
863 displayed greater than 91% accuracy, exhibiting successful separation of single-cells into  
864 chronological stages. Error bars indicate standard error.

865 (c) Balloonplots showing the age-classification of de-novo sequenced beta-cells. GERAS  
866 predicted the age of the cells from independent sources with greater than 92% accuracy,  
867 showcasing the robustness of the model in handling biological and technical noise.

868 (d) The capacity of GERAS to perform regression analysis was tested using cells with ages  
869 in-between the chronological stages used to train GERAS. More than 97% of the cells  
870 from the intermediate time-points classify in the nearest-neighbor stages.

871 Number of cells for each condition is denoted by 'n'.

872

873 **Figure 2: Impact of calorie intake on the chronological stage of zebrafish beta-cells**

874 (a) The impact of calorie intake on the predicted age of beta-cells was investigated.

875 Statistically, a higher proportion of beta-cells from 4 mpf animals fed three-times-a-day  
876 classified as 'Adult', as compared to cells from animals on intermittent feeding, in which  
877 a majority of the cells (67%) classified as adolescent. (Fisher's Exact Test, \*\*p-value <  
878 0.01).

879 **(b)** To identify the genes contributing to chronological stage classification, correlation  
880 analysis was performed. To this end, all beta-cells from the group fed three-times-a-day  
881 were used to calculate the correlation coefficient between gene expression and the  
882 probability of the cell to be classified in the ‘Adolescent’ stage. The Y-axis denotes the  
883 correlation coefficient and the X-axis depicts all the genes expressed in the beta-cells.  
884 The extreme fifth-percentile values are colored, with the red marking the top 5<sup>th</sup> percentile  
885 (positive correlation) and blue marking the bottom 5<sup>th</sup> percentile (negative correlation).  
886 Genes with positive correlation, which include *junba* and *fosab*, contribute towards  
887 classification in the ‘Adolescent’ stage as opposed to classification in the ‘Adult’ stage,  
888 thereby increasing the probability of a cell being classified as younger.

889 **(c)** Gene-ontology (GO) analysis using DAVID<sup>44</sup> for genes in the extreme fifth-percentile.  
890 This analysis includes the genes exhibiting negative (blue in **b**) and positive (red in **b**)  
891 correlation.

892 Zebrafish illustration provided with permission.

893

### 894 **Figure 3: Inhibition of *junba* reduces the proliferation of zebrafish beta-cells**

895 **(a)** Maximum intensity confocal projections of islet from 30 dpf animal showing mosaic  
896 expression of *nls-BFP-2A-DN-junba* (blue) together with *Tg(ins:FUCCI-S/G2/M)* (green)  
897 and *Tg(ins:FUCCI-G0/G1)* (red). Arrowheads mark proliferating beta-cells, as indicated  
898 by the presence of green fluorescence and absence of red fluorescence. Scale bar 10  $\mu$ m.

899 **(b)** Tukey-style boxplots showing the percentage of proliferating beta-cells among BFP+ and  
900 BFP- cells. BFP+ cells co-express *DN-junba*, while the BFP- cells act as internal control.  
901 The BFP+ cells show a statistically significant decrease in the proportion of proliferating  
902 cells (t-test, \*\*p-value <0.01). ‘n’ denotes number of islets.



903

904 **Figure 4: A Chronological age classifier for human pancreatic cells**

905 **(a)** A single chronological age classifier for the entire ensemble of human pancreatic cells  
906 using machine learning. No cell-type segregation was performed during training.

907 **(b)** Barplot showing the accuracy of GERAS on classifying the age of pancreatic cells that  
908 were not used for training the model. An accuracy of 95% was achieved for cells  
909 previously unseen by GERAS. **(b')** The classification accuracy of GERAS on the  
910 previously unseen pancreatic cells after segregating them into major cell-types.

911 Classification accuracy equals the proportion of cells for which the predicted stage  
912 matched the actual stage. For each cell-type, greater than 93% accuracy was achieved.  
913 Error bars indicate standard error.

914 **(c)** External validation for the classifier was provided by human pancreatic single-cell mRNA  
915 expression data obtained from an independent publication. Cells from individuals  
916 belonging to the 'Middle' (38 – 54 years) stage of the classifier displayed greater than  
917 93% accuracy.

918 **(d)** Balloonplot showing classification of cells from individuals with similar chronological  
919 age but different BMI. In individuals with normal BMI, 32% of the cells were classified  
920 in 'Juvenile' and 'Young' stages, while none (0%) of the cells from individuals with obese  
921 BMI were similarly classified.

922 Number of cells for each condition is denoted by 'n'.

923

924 **Figures**

925 **Figure 1**

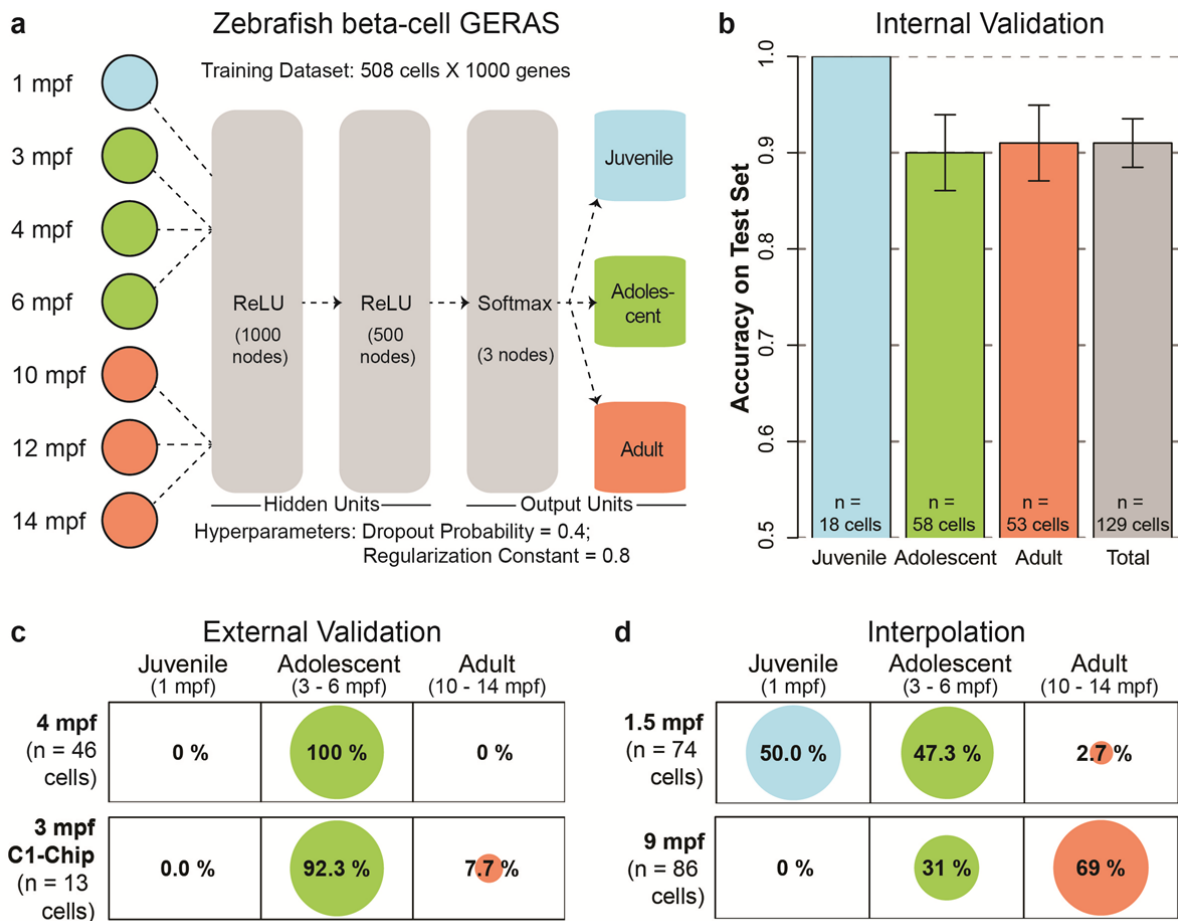

926

927

928 **Figure 2**

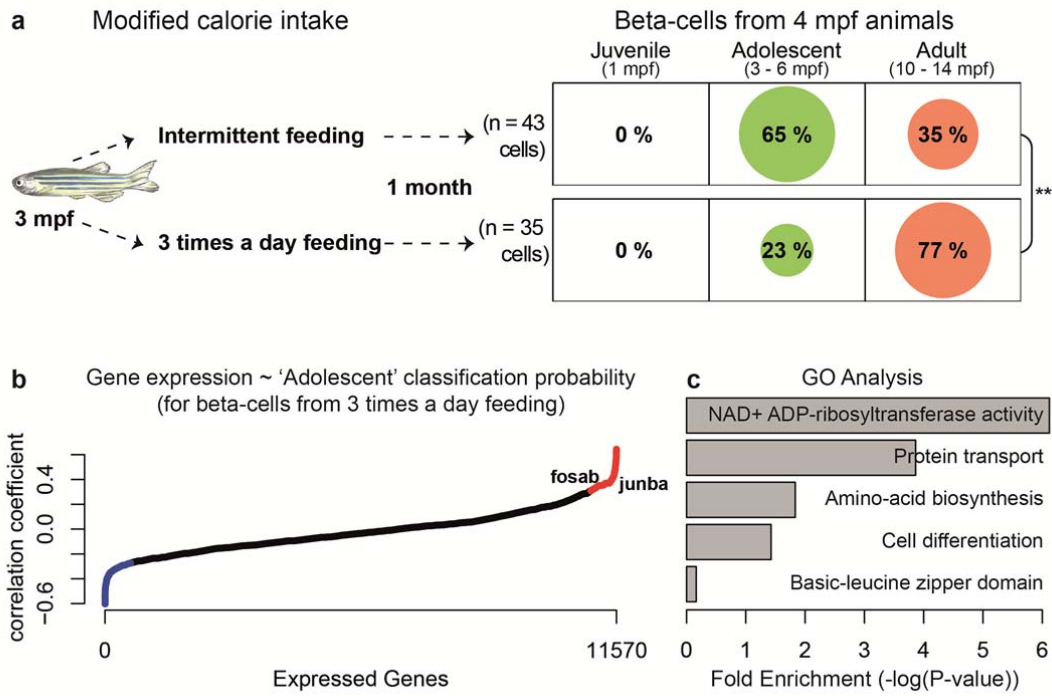

929

930

931

932 **Figure 3**

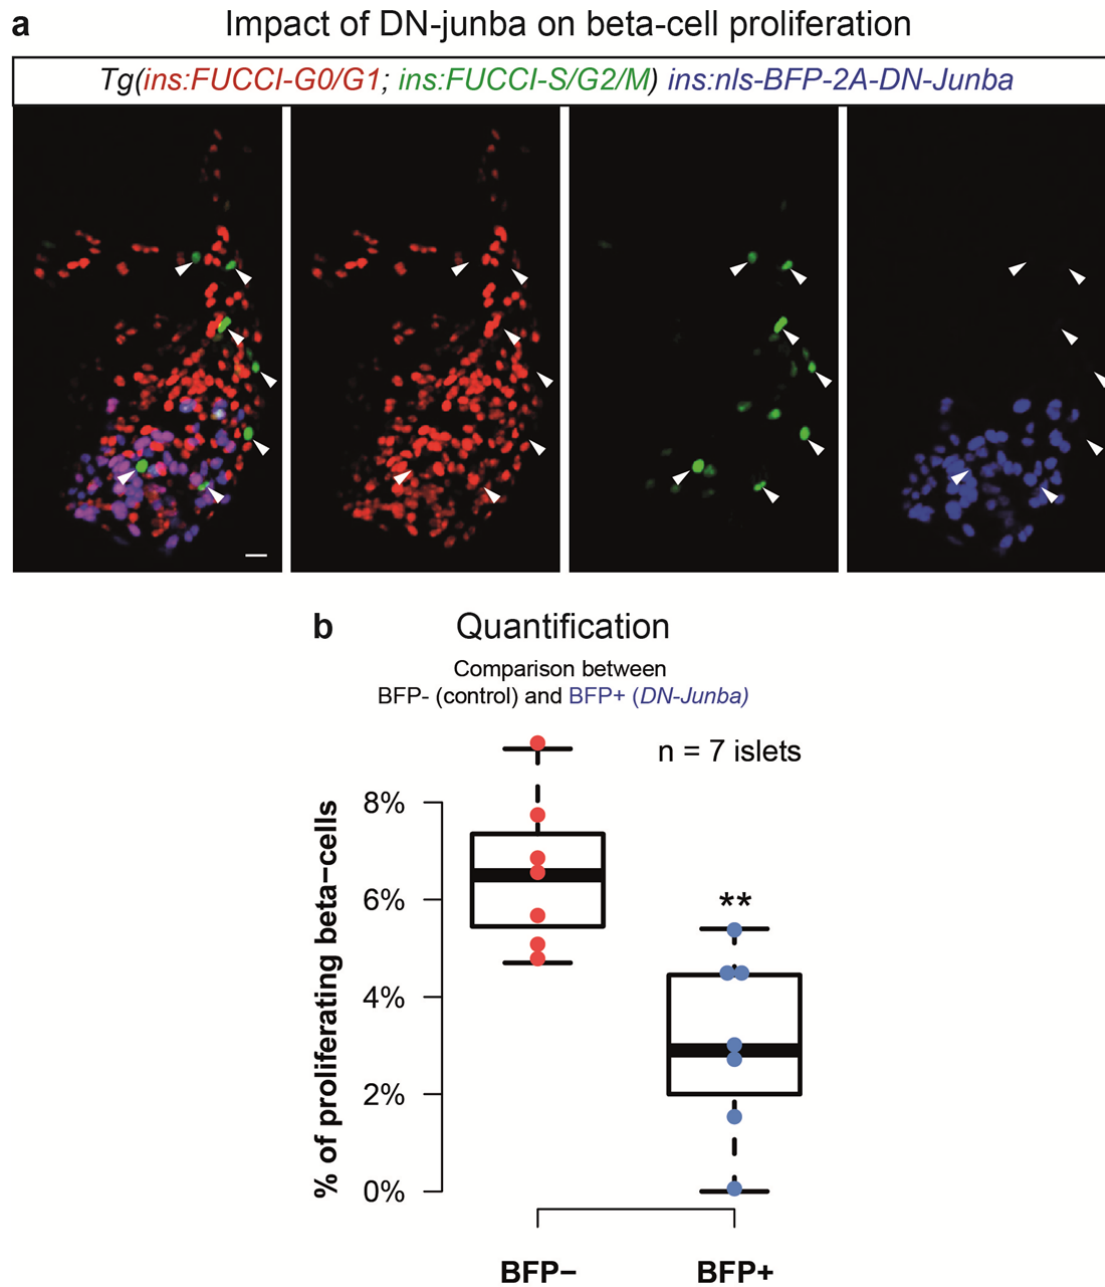

933

934

935

936 **Figure 4**

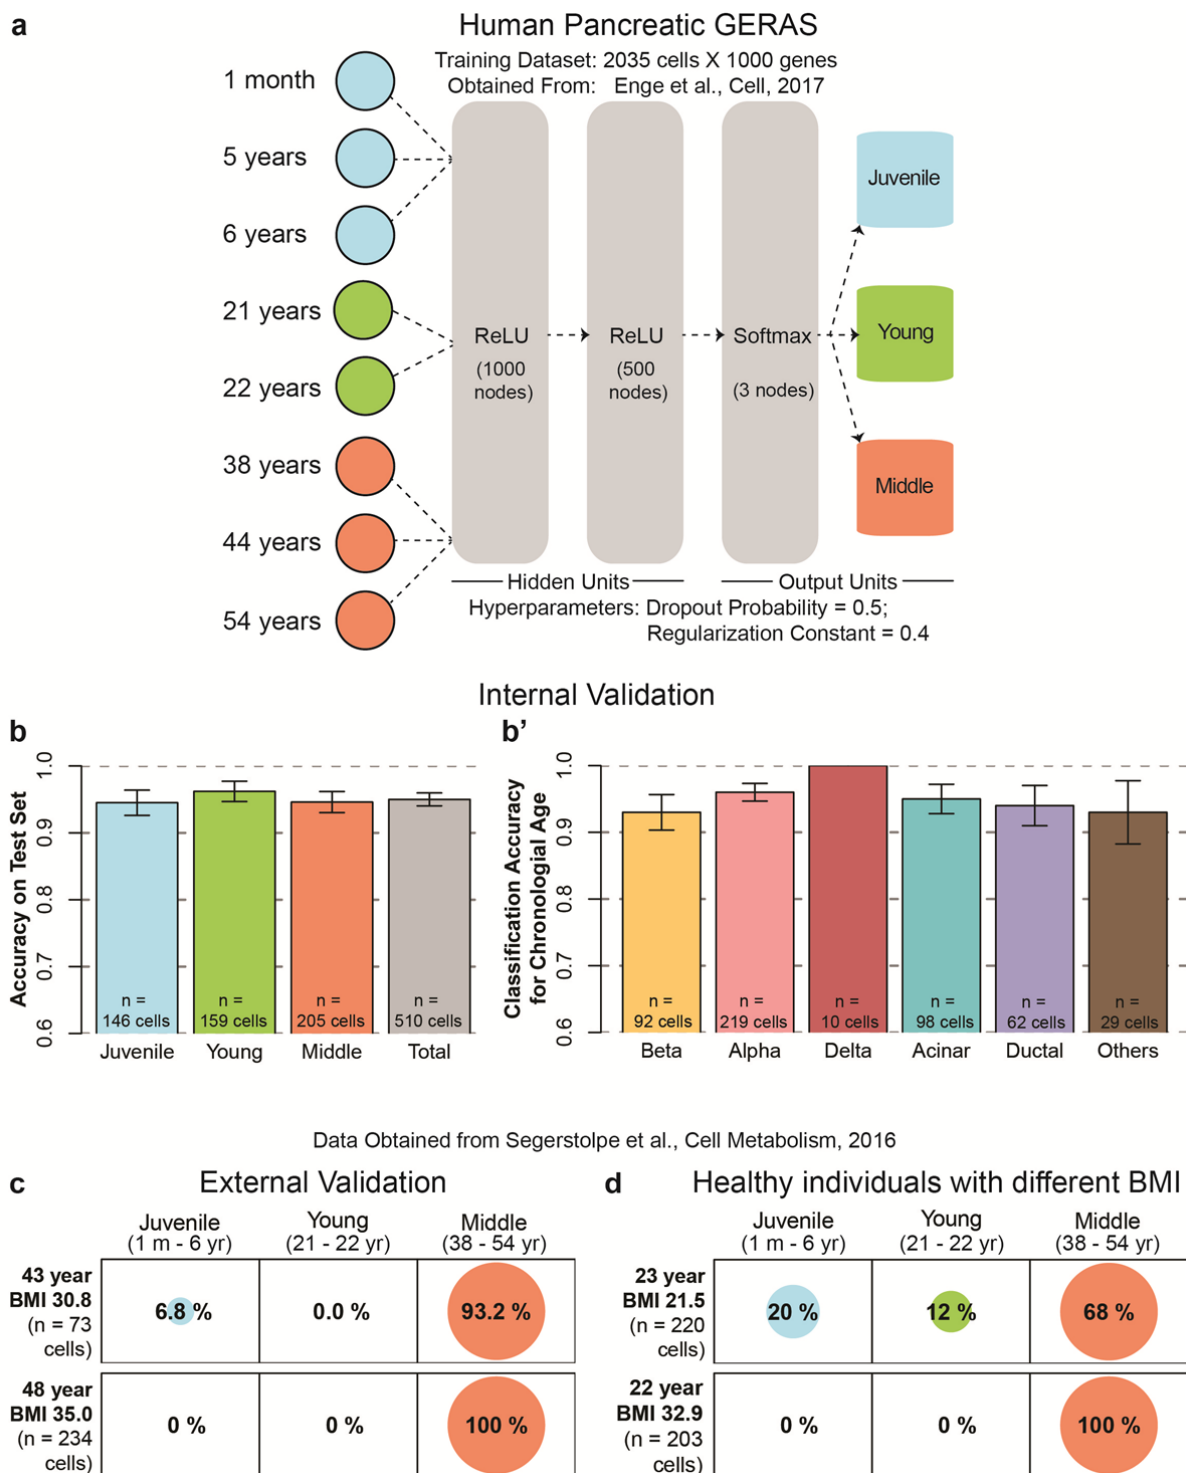

937
